# Supplementary material for: Altered physiology of gastrointestinal vagal afferents following neurotrauma
Source: PubMed Central journal article supplement — Neural Regen Res. 2020 Aug 24;16(2):254–63. doi: 10.4103/1673-5374.290883 (PMC7896240; doi:10.4103/1673-5374.290883), 2020-08-24
Supplement: NRR-16-254_Suppl1.pdf [file NRR-16-254_Suppl1.pdf]

## OPEN PEER REVIEW REPORT 1

**Name of journal:** Neural Regeneration Research

**Manuscript NO:** NRR-D-20-00076

**Title:** Altered Physiology of Gastrointestinal Vagal Afferents following Neurotrauma

**Reviewer's Name:** David Benn Lovejoy

**Reviewer's country:** Australia

**Date sent for review:** 2020-02-21

### COMMENTS TO AUTHORS

The authors have produced a first-class review in the important area of GI disturbance following TBI or SCI, focusing on the neuroplasticity of the vagal afferents. The authors include useful discussion of GI vagal afferent physiology and how this becomes modulated in neurotrauma, including discussion of the role played by the GI microbiome. This review is timely, comprehensive and should encourage developments in an important area of human health.

(Congratulations authors on a extremely well prepared and interesting paper - as a reviewer, it is refreshing to receive such a polished and flawless submission. I had to work hard to find even a typo (page 2 line 48, McKee ref is uppercase and similarly, page 37 line 24, Zhuo ref). The only suggestion I'd make is that inclusion of a figure depicting aspects of GI vagal afferent physiology described in the paper would increase visual appeal - but I do not think this is essential)
